# Supplementary material
Source: PubMed Central journal article supplement (PMC4420743)
Supplement: supp_nsu102_scan-14-055-File006.pdf [file supp_nsu102_scan-14-055-File006.pdf]

# Supplementary Material

## *BDNF*val66met affects neural activation pattern during fear conditioning and 24h delayed fear recall

### 1. Analyses for all three genotype groups

Additional second level models for the categorical regressors were set up that were identical to the second level models described in the main manuscript, except that the factor group consisted of three levels (val/val, val/met, met/met). Note that these analyses were exploratory due to the low number of homozygous met-individuals and mainly serve the purpose to further explore the main effects reported in the main manuscript.

#### 1.1. Acquisition

##### Met-carrier > val/val

During fear acquisition, the additional analyses also showed an effect of *BDNF*val66met genotype on right amygdala activation for the contrast CS+>CS- in met-carriers>val/val ( $x,y,z= 18,0,18$ ;  $Z=5.02$ ,  $p_{FWE(wholebrain)}=0.011$ ). Here carriers of one and two met-alleles were modelled separately in the second level model but for the statistical test treated as the same group. Extracted parameter estimates suggest an allele-load effect of *BDNF*val66met on right amygdala activation in this contrast (see **supplementary Figure 1A**).

Additional genotype-dependent differences suggesting an allele-load effect were observed in the same contrast in the left dorsomedial ACC ( $x,y,z= 2,24,24$ ;  $k=33$ ;  $Z=3.49$ ,  $p<0.001$  uc, see **supplementary Figure 1B**)) and the left inferior frontal cortex ( $x,y,z= -46,16,10$ ;  $k=101$ ;  $Z=4.09$ ,  $p<0.001$  uc), whereas effects in the left putamen ( $x,y,z= -18,12,-8$ ;  $k=46$ ;  $Z=3.99$ ,  $p<0.001$  uc), as well as the supplementary motor area ( $x,y,z= -6,4,-70$ ;  $k=36$ ;  $Z=4.53$ ,  $p<0.001$  uc), the mid ACC ( $x,y,z= -8,-12,44$ ;  $k=39$ ;  $Z=3.72$ ,  $p<0.001$  uc), the precentral gyrus ( $x,y,z= -20,-22,72$ ;  $k=51$ ;  $Z=4.32$ ,  $p<0.001$  uc) and a cluster in the parietal lobe ( $x,y,z= -36,-22,50$ ;  $k=52$ ;  $Z=3.69$ ,  $p<0.001$  uc) were mainly driven by high parameter estimates to the CS+ in met-homozygotes (data not shown).

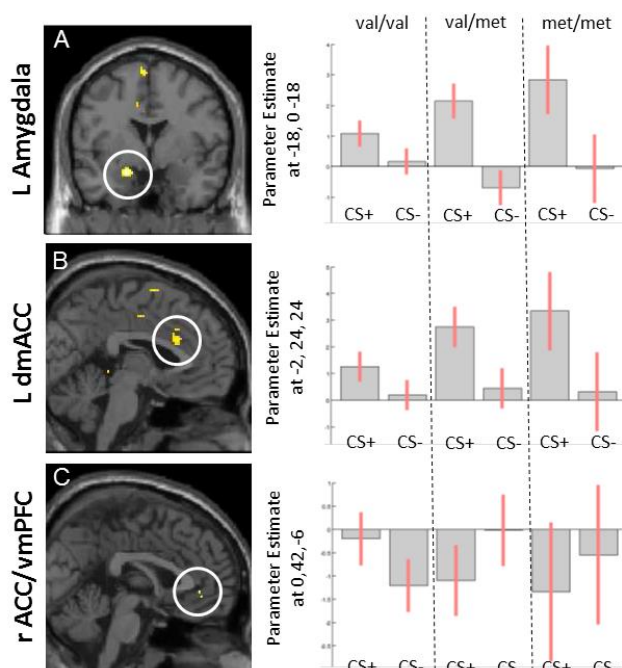

**Supplementary Figure 1.** Activation in the contrast CS+> CS- (categorical) for met-carriers > val/val in the left amygdala (A) and the dmACC (B) and for val/val > met-carriers in the rostral ACC/vmPFC (C).

Images are thresholded at  $p<0.001(uc)$  for illustrative purposes. Error bars represent s.e.m. and beta estimates are derived from peak coordinates.

### Val/val > met-carrier

No area showed significant higher activation in the contrast CS+>CS- for val-homozygotes vs. met/met at  $p=0.001_{uc}$ . At a more lenient threshold of  $0.01_{uc}$  weak activation in the vmPFC area observed in the main analyses of the manuscript was observed ( $x,y,z = -0,42,-6;k=1; Z=2.36, p=0.009_{uc}$ ). Here a dominant effect of the met-allele rather than an allele-dose effect was suggested by the parameter estimates (see **supplementary Figure 1C**).

## 1.2. Early Extinction

### Met-carrier > val/val

During fear acquisition, the additional analyses with all three genotype groups also showed an effect of *BDNF*val66met genotype on the activation of the right ( $x,y,z = -50,2,0;k=65; Z=4.40, p<0.001_{uc}$ ) and left ( $x,y,z = 44,22,-8;k=154; Z=3.70, p<0.001_{uc}$ ) insula, the left amygdala ( $x,y,z = 22,-4,-12;k=3; Z=3.20, p=0.001_{uc}$ ) and the left mid ACC ( $x,y,z = -10,18,38;k=98; Z=3.90, p<0.001_{uc}$ ). No hippocampus activation differences were observed. Here carriers of one and two met-alleles were modelled separately in the second level model but for the statistical test treated as the same group. Extracted parameter estimates from these regions rather suggest an allele-load effect (with the exception of the left insula) of *BDNF*val66met on in this contrast (see **supplementary Figure 2A,B,C**).

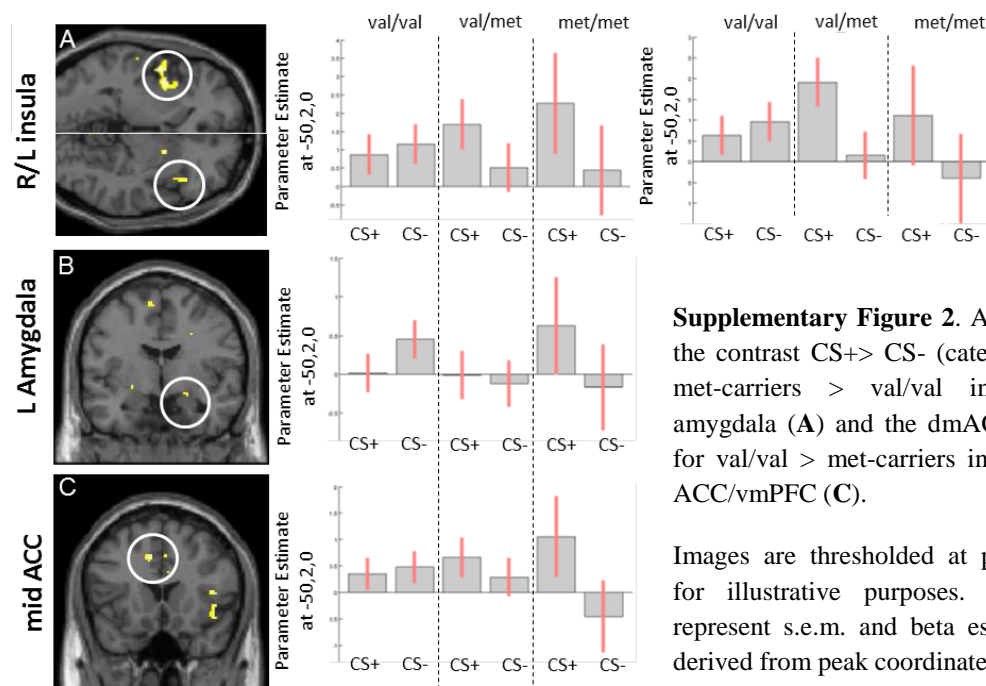

**Supplementary Figure 2.** Activation in the contrast CS+>CS- (categorical) for met-carriers > val/val in the left amygdala (A) and the dmACC (B) and for val/val > met-carriers in the rostral ACC/vmPFC (C).

Images are thresholded at  $p<0.001_{uc}$  for illustrative purposes. Error bars represent s.e.m. and beta estimates are derived from peak coordinates.

### Val/val > met-carrier

No area showed significant higher activation in the contrast CS+>CS- for val-homozygotes vs. met/met at  $p=0.001_{uc}$ .

## 2. Exploratory whole brain analyses

**Supplementary Table 1.** Peak grey matter coordinates based on the WFU Pickatlas (based on the analyses reported in the main document) with a spatial extend of  $k \geq 10$  at an exploratory threshold of  $p < 0.001$  uncorrected. \* indicates FWE-corrected p-values (whole brain)

| Phase                    | Contrast | cat/pm | comparison            | region             | x,y,z       | Z    | k  | p      |
|--------------------------|----------|--------|-----------------------|--------------------|-------------|------|----|--------|
| Conditioning             | CSP>CSM  | cat.   | met-carrier > val/val | L amygdala         | -18,0,-18   | 4.04 | 10 | <0.001 |
|                          |          |        |                       | precentral lobule  | 0,-18,68    | 3.81 | 17 | <0.001 |
|                          |          |        |                       | R precentral       | 38,-16,62   | 3.77 | 10 | <0.001 |
|                          |          | cat.   | val/val > met-carrier | R ACC/vmPFC        | 22,44,-8    | 3.84 | 16 | <0.001 |
|                          |          |        |                       |                    |             |      |    |        |
|                          |          |        |                       |                    |             |      |    |        |
|                          |          | pm.    | met-carrier > val/val | none               |             |      |    |        |
|                          |          |        |                       |                    |             |      |    |        |
|                          |          | pm.    | val/val > met-carrier | L supp. Motor area | -4,-18,54   | 3.84 | 37 | <0.001 |
|                          |          |        |                       | L temporal pole    | 36,6,-28    | 3.74 | 14 | <0.001 |
|                          |          |        |                       | R Sup. temporal    | 58,-10,-4   | 3.68 | 35 | <0.001 |
|                          |          |        |                       | R ACC              | 8,44,4      | 3.68 | 24 | <0.001 |
|                          |          |        |                       | cerebellum         | 26,-46,-40  | 3.65 | 17 | <0.001 |
|                          |          |        |                       | L inf. frontal     | -36,30,10   | 3.58 | 22 | <0.001 |
|                          |          |        |                       | L inf. frontal     | -38,22,16   | 3.25 | 14 | 0.001  |
| Extinction<br>(1st half) | CSP>CSM  | cat.   | met-carrier > val/val | L thalamus         | -6,-8,-4    | 5.33 | 58 | 0.005* |
|                          |          |        |                       | L insula           | -50,2,0     | 4.80 | 80 | 0.059* |
|                          |          |        |                       | L putamen          | -24,-6,-8   | 4.77 | 39 | 0.068* |
|                          |          |        |                       | cerebellum         | 2,-60,-30   | 4.48 | 55 | <0.001 |
|                          |          |        |                       | R lateral PFC      | 36,60,12    | 4.40 | 25 | <0.001 |
|                          |          |        |                       | R postcentral gy   | 66,-16,16   | 4.28 | 62 | <0.001 |
|                          |          |        |                       | R rodlandic operc. | 54,-26,20   | 4.20 | 41 | <0.001 |
|                          |          |        |                       | R post. Insula     | 44,-16,20   | 4.05 | 24 | <0.001 |
|                          |          |        |                       | R sup. temporal    | 66,-16,4    | 4.02 | 20 | <0.001 |
|                          |          |        |                       | R supramarg. gy.   | 66,-40,30   | 3.99 | 14 | <0.001 |
|                          |          |        |                       | R ant. Insula      | 40,28,-4    | 3.97 | 53 | <0.001 |
|                          |          |        |                       | cerebellum         | -34,-54,-28 | 3.89 | 17 | 0.001  |
|                          |          |        |                       | R. sup. temporal   | 52,-26,10   | 3.78 | 20 | 0.001  |
|                          |          |        |                       | R insula           | 50,4,-4     | 3.76 | 22 | 0.001  |
|                          |          |        |                       | R insula           | 34,4,8      | 3.70 | 31 | 0.001  |
|                          |          |        |                       | L insula           | -36,6,-2    | 3.66 | 11 | 0.001  |
|                          |          |        |                       | mid ACC            | 2,14,40     | 3.40 | 12 | 0.001  |
|                          |          | cat.   | val/val > met-carrier | L precuneus        | -18,-46,14  | 4.30 | 45 | <0.001 |
|                          |          |        |                       | mid Cingulum       | 18,4,40     | 4.26 | 23 | <0.001 |
|                          |          | pm.    | met-carrier > val/val | none               |             |      |    |        |
|                          |          |        |                       |                    |             |      |    |        |
|                          |          | pm.    | val/val > met-carrier | L somatosensory    | -24,-50,56  | 3.70 | 10 | <0.001 |
|                          |          |        |                       | L insula           | -34,14,-10  | 3.66 | 25 | <0.001 |
| Extinction<br>(2nd half) | CSP>CSM  | cat.   | met-carrier > val/val | none               |             |      |    |        |
|                          |          |        |                       |                    |             |      |    |        |
|                          |          | cat.   | val/val > met-carrier | L lateral PFC      | -44,50,10   | 4.14 | 49 | <0.001 |
|                          |          |        |                       | R lateral PFC      | 42,54,6     | 3.91 | 18 | <0.001 |
|                          |          |        |                       | L mid frontal      | -32,30,34   | 3.67 | 17 | <0.001 |
|                          |          |        |                       | R mid frontal      | 34,46,32    | 3.40 | 13 | <0.001 |
